# Supplementary material for: Neutral versus cationic Group 3 metal alkyl catalysts: performance in intramolecular hydroamination/cyclisation
Source: Royal Society of Chemistry journal article supplement (doi:10.1039/b512135c), 2005-11-03
Supplement: b512135c.pdf [file b512135c.pdf]

## Electronic Supplementary Information

### Neutral versus cationic group 3 metal alkyl catalysts: performance in intramolecular hydroamination/cyclisation

Sergio Bambirra, Hayato Tsurugi, Daan van Leusen and Bart Hessen\*

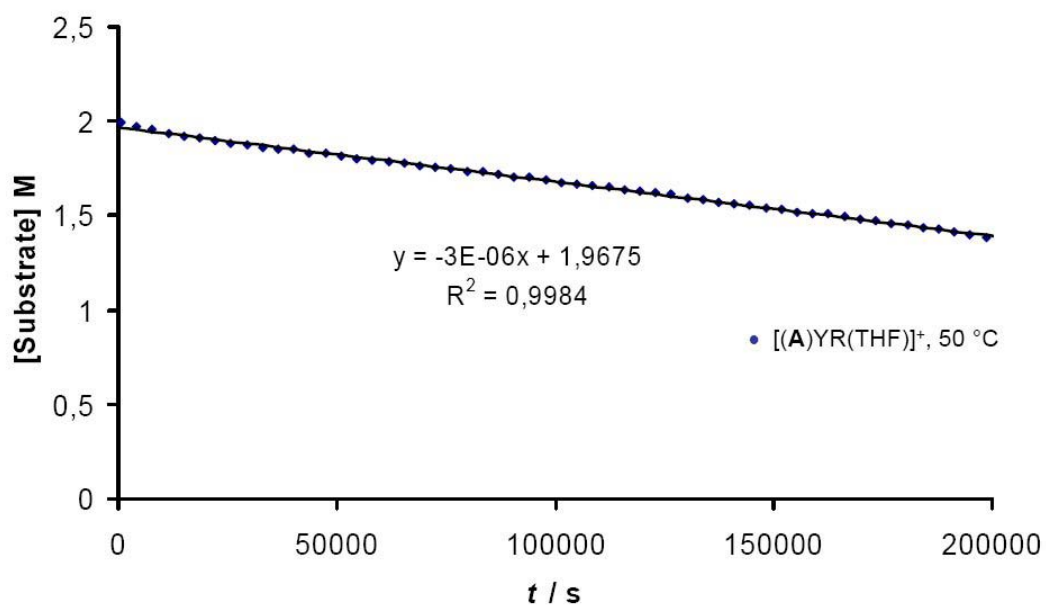

Figure 1. Hydroamination/cyclisation of 2,2-dimethyl-4-pentenylamine with [(A)YR(THF)]<sup>+</sup> in C<sub>6</sub>D<sub>6</sub> at 50 °C.

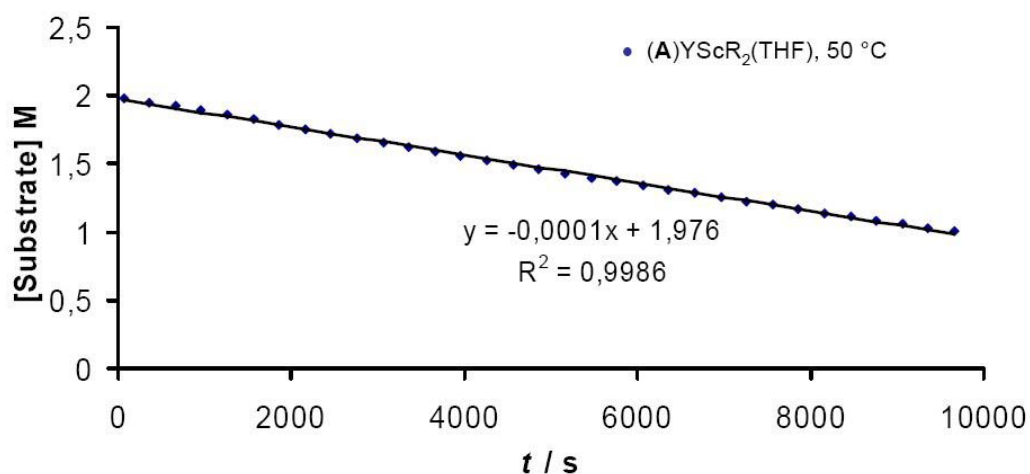

Figure 2. Hydroamination/cyclisation of 2,2-dimethyl-4-pentenylamine with (A)ScR<sub>2</sub>(THF) in C<sub>6</sub>D<sub>6</sub> at 50 °C till 50 % substrate consumption.

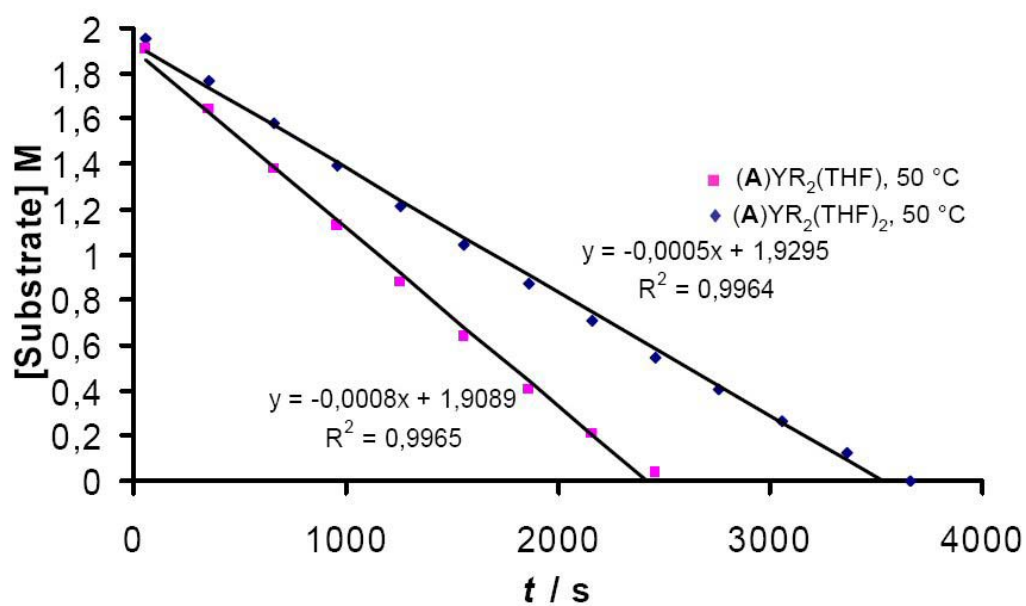

Figure 3. Hydroamination/cyclisation of 2,2-dimethyl-4-pentenylamine with (A)YR<sub>2</sub>(THF) (A)YR<sub>2</sub>(THF)<sub>2</sub> and in C<sub>6</sub>D<sub>6</sub> at 50 °C.

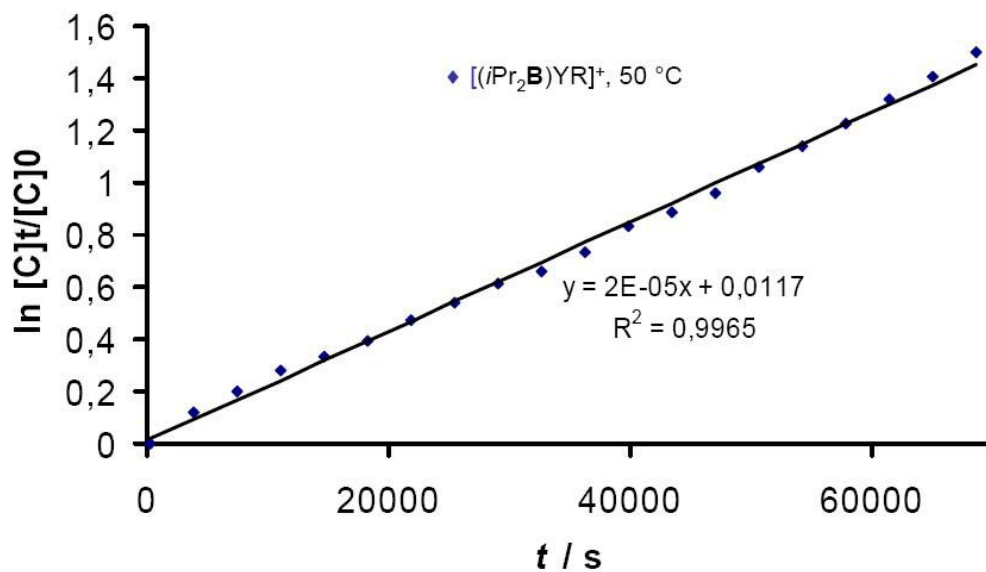

Figure 4. First-order plot for the hydroamination/cyclisation of 2,2-dimethyl-4-pentenylamine with  $[(iPr_2B)YR]^+$  in  $C_6D_6$ .

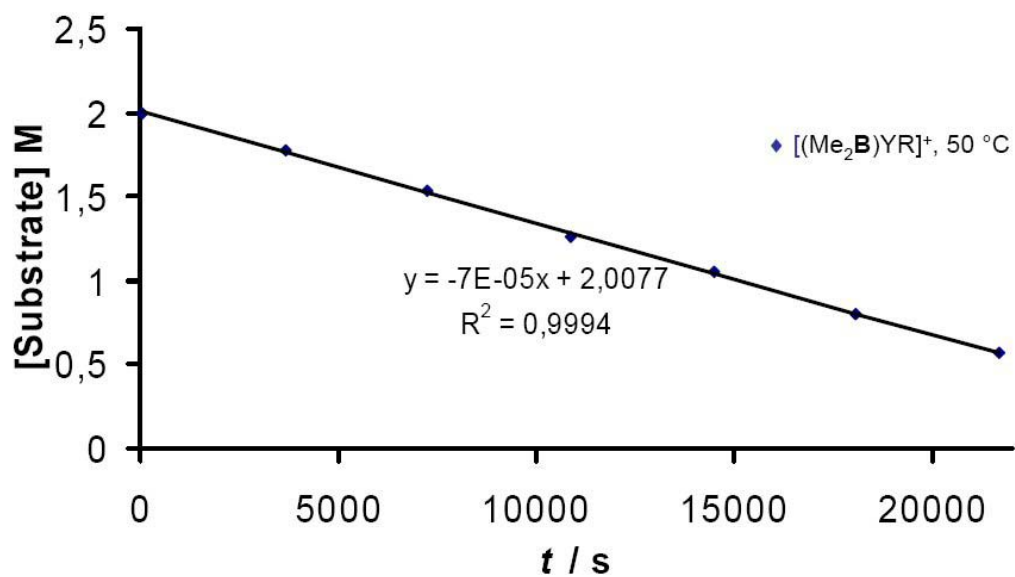

Figure 5. Hydroamination/cyclisation of 2,2-dimethyl-4-pentenylamine with  $[(Me_2B)YR]^+$  in  $C_6D_6$  at 50 °C.

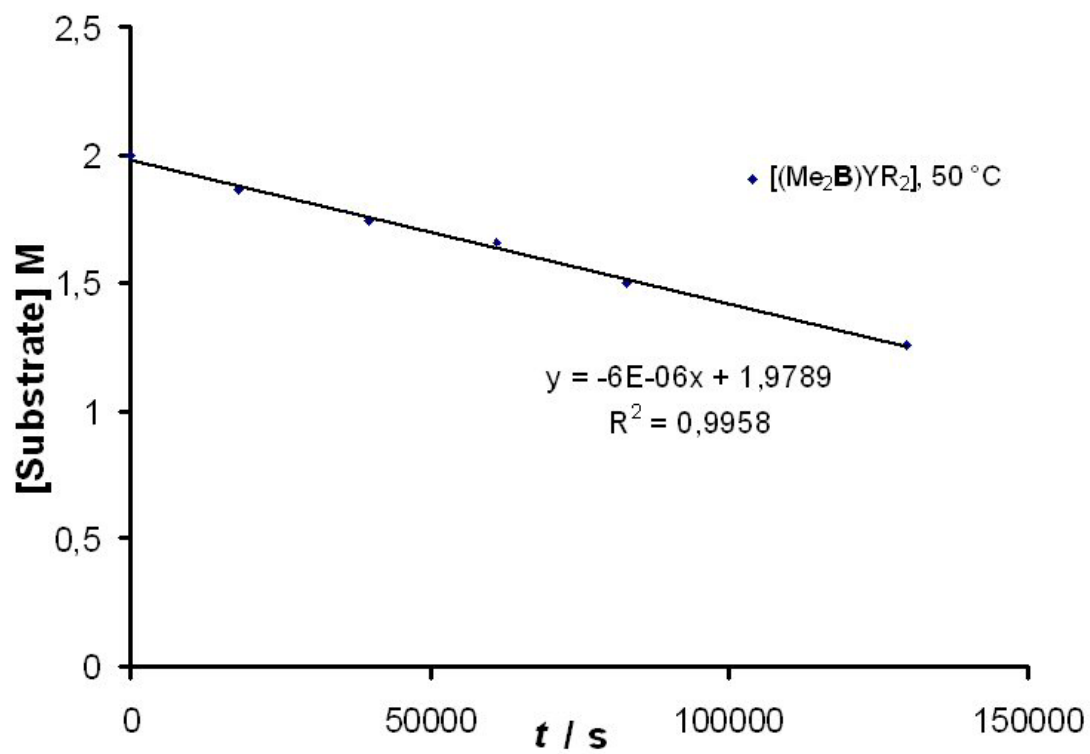

Figure 6. Hydroamination/cyclisation of 2,2-dimethyl-4-pentenylamine with [(Me<sub>2</sub>B)YR<sub>2</sub>] in C<sub>6</sub>D<sub>6</sub> at 50 °C.
